# Supplementary material for: Novel high-k polymers as dielectric layers for organic thin-film transistors
Source: Royal Society of Chemistry journal article supplement (doi:10.1039/c5py00891c), 2015-01-01
Supplement: c5py00891c1.pdf [file c5py00891c1.pdf]

## Supporting information

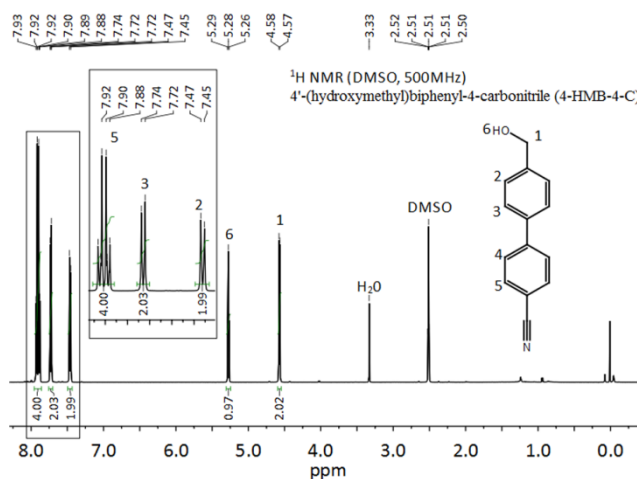

The <sup>1</sup>H NMR spectrum and structure of 4-HMB-4-C.

The 4-HMB-4-C characterization: <sup>1</sup>H NMR (DMSO, 500 MHz):  $\delta$  7.91 (td,  $J = 8.6$ , 6.5 Hz, 4H), 7.76 – 7.70 (m, 2H), 7.46 (d,  $J = 8.3$  Hz, 2H), 5.28 (t,  $J = 5.7$  Hz, 1H), 4.57 (d,  $J = 5.7$  Hz, 2H).

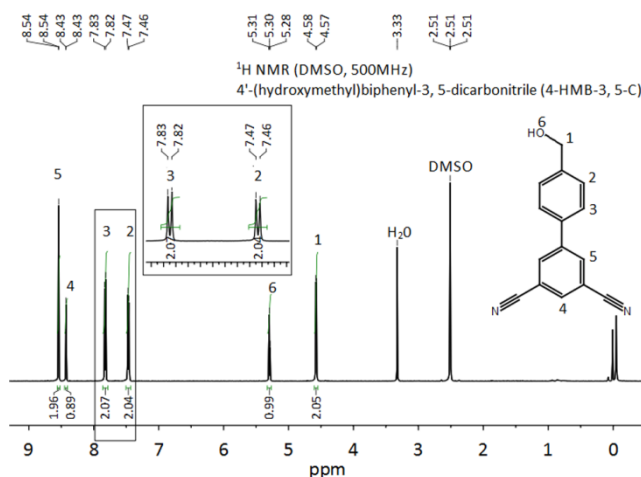

The <sup>1</sup>H NMR spectrum and structure of 4-HMB-3,5-C.

The 4-HMB-3, 5-C characterization:  $^1\text{H}$  NMR (DMSO, 500 MHz):  $\delta$  8.54 (d,  $J = 1.4$  Hz, 2H), 8.43 (d,  $J = 1.3$  Hz, 1H), 7.82 (d,  $J = 8.2$  Hz, 2H), 7.47 (d,  $J = 8.3$  Hz, 2H), 5.30 (t,  $J = 5.7$  Hz, 1H), 4.58 (d,  $J = 5.7$  Hz, 2H).

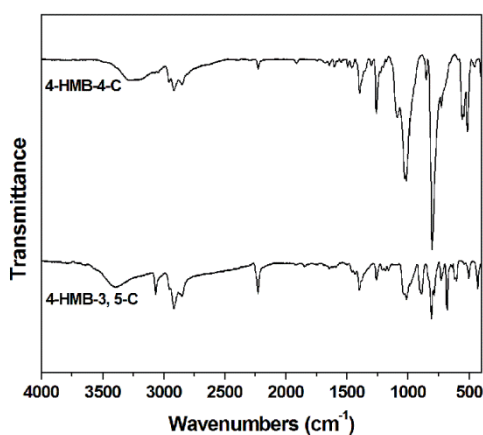

The FT-IR spectra of 4-HMB-4-C and 4-HMB-3, 5-C.

FT-IR (KBr,  $\text{cm}^{-1}$ ) of 4-HMB-4-C: 3440-3082 (s, -OH), 2916, 2850 (w, - $\text{CH}_2$ -), 2229 (m, -CN), 1396, 1257, 1091, 1014 (m, benzene). FT-IR (KBr,  $\text{cm}^{-1}$ ) of 4-HMB-3, 5-C: 3533-3224 (s, -OH), 2920, 2850 (w, - $\text{CH}_2$ -), 2229 (m, -CN), 1400, 1257, 1037, 1014 (m, benzene).
